# Supplementary material for: Gene expression profiling to identify the toxicities and potentially relevant disease outcomes due to endosulfan exposure
Source: Royal Society of Chemistry journal article supplement (doi:10.1039/c5tx00332f), 2016-01-01
Supplement: c5tx00332f3.pdf [file c5tx00332f3.pdf]

**Supplementary Table. 1 Primer sequences**

| <b>Gene</b>     | <b>sequence</b>                                                | <b>Product Length(bp)</b> |
|-----------------|----------------------------------------------------------------|---------------------------|
| <i>Gapdh</i>    | F:5'GGGAAACTGTGGCGTGAT3'<br>R:5'GAGTGGGTGTCGCTGTTGA3'          | 299                       |
| <i>Kcnma1</i>   | F:5'ATAGTGC GGTTAGTGG AAGAA3'<br>R:5'GGGGGAGATGTTGTGAAGA3'     | 143                       |
| <i>Il1r1l</i>   | F:5'CATTGACCTCTACA ACTGGACA3'<br>R:5'ACCTGCGTCCTCAGTCATC3'     | 127                       |
| <i>Ncf1</i>     | F:5'ACGGACAACCAGACAAAAAAG3'<br>R:5'CTGACAGAACCACCAACCG3'       | 207                       |
| <i>Sema3a</i>   | F:5'CAGTTGTGCCTCATTATCCG3'<br>R:5'CGCTGTAGGTCCCTTTGCT3'        | 254                       |
| <i>Adamts18</i> | F:5'CCTCTGTCGCTGTGTCTACG3'<br>R:5'TCTCCTCTGCTGTCC TTTTG3'      | 165                       |
| <i>Actb</i>     | F:5'CCTGTACGCCAACACAGTGC3'<br>R:5'ATACTCCTGCTTGCTGATCC3'       | 211                       |
| <i>Rock2</i>    | F:5'GAAGTGGGTTAGTCGGTTGG3'<br>R:5'CAGTTAGCTAGGTTTGT TGGG3'     | 157                       |
| <i>Pxn</i>      | F:5'GAGAAGCCTAAGCGGAATGG3'<br>R:5'AGATGCGTGTCTGCTGTTGG3'       | 175                       |
| <i>Tp53</i>     | F:5'GCCATATCTGTGAAATGCT3'<br>R:5'ACTTGACA ACTCCCTCTACCTAAC3'   | 214                       |
| <i>Cdkn1a</i>   | F:5'CACTTTGATTAGCAGCGGAACA3'<br>R:5'GAGAAACGGGAACCAGGACAC3'    | 261                       |
| <i>Max</i>      | F:5'GGAAATGAGCGATAACGATG3'<br>R:5'CAGTTGGAAAAGGCAAGTGT3'       | 239                       |
| <i>Vegfa</i>    | F:5'CATGCAGATTATGCGGATCAA3'<br>R:5'GCATTACATTTGTTGTGCTGTAG3'   | 82                        |
| <i>Pcna</i>     | F:5'TGCCTTCTGGTGAATTTGC3'<br>R:5'CACCGTTGAAGAGAGTGGAGT3'       | 260                       |
| <i>Atm</i>      | F:5'GCTTCTCCCTTTGTTGTGACTTA3'<br>R:5'CAATACCTGTTTCTGAACCTCCA3' | 149                       |
| <i>Mmp3</i>     | F:5'ACAAGGAGGCAGGCAAGAC3'<br>R:5'CACGCACAGCAACAGTAGGA3'        | 99                        |
| <i>Stag2</i>    | F:5'AAAACGGAAAAGTGGTTGAGG3'<br>R:5'TAGTGGAGGTGAGTTGTGGTG3'     | 134                       |
| <i>Satb2</i>    | F:5'GTGGCTGAATATAAGGACGA3'<br>R:5'AAAATCCTTGGACCGATGTAT3'      | 192                       |
| <i>Tnf</i>      | F:5'CCCTGGTATGAGCCCATCTATC3'<br>R:5'CGAAGTGGTGGTCTTGTGCT3'     | 298                       |
| <i>Il-6</i>     | F:5'AAATTCGGTACATCCTCGACGG3'<br>R:5'GGAAGGTT CAGGTTGTTTCTGC3'  | 112                       |

| <b>Gene</b> | <b>sequence</b>                                           | <b>Product Length(bp)</b> |
|-------------|-----------------------------------------------------------|---------------------------|
| <i>Il-8</i> | F:5'TGGCAGCCTTCCTGATTCT3'<br>R:5'GGGTGGAAAGGTTTGGAGTATG3' | 109                       |
