# Supplementary figures and images for: Gene expression profiling to identify the toxicities and potentially relevant disease outcomes due to endosulfan exposure
Source: Royal Society of Chemistry journal article supplement (doi:10.1039/c5tx00332f), 2016-01-01

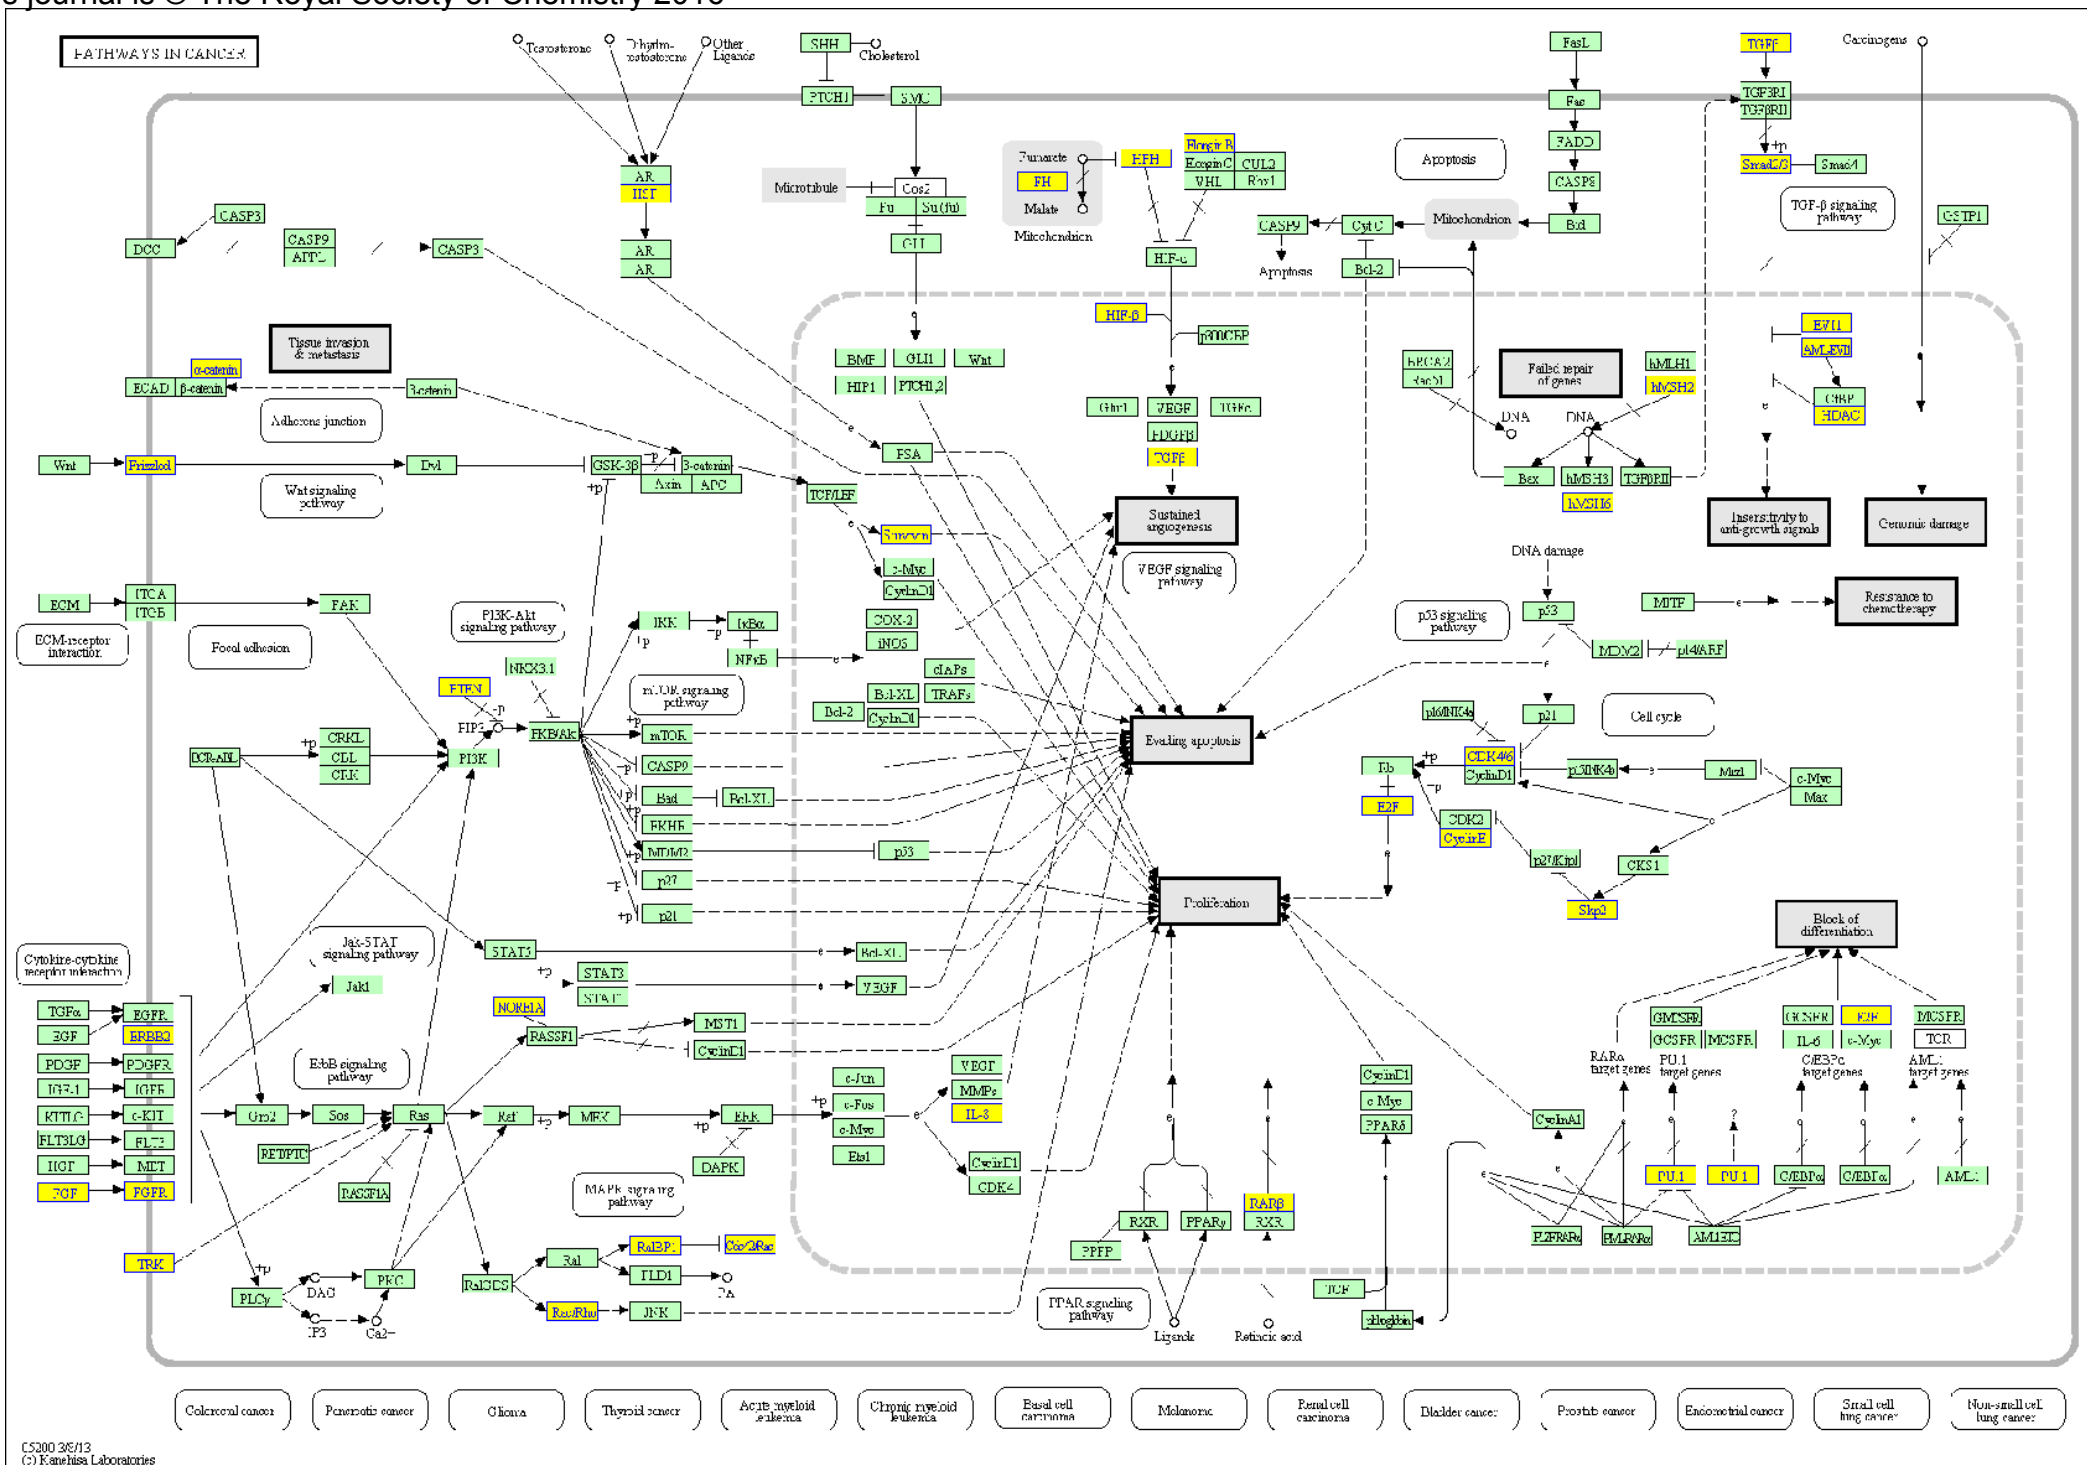

Supplement: c5tx00332f2.pdf [file c5tx00332f2.pdf]
